# Supplementary material for: Plasma Metabolomic Profiling in 1391 Subjects with Overweight and Obesity from the SPHERE Study
Source: MDPI journal article supplement (doi:10.3390/metabo11040194), 2021-03-24
Supplement: s1 [file s1]

## Supplementary material

**Table S14** – Summary information about findings of our study, including the comparison with reference values reported by Trabado et al. 2017 (Trabado et al., 2017), the percentage of variation identified in the Tobit models, and a comparison with other studies.

| Chemical characteristic                           | Differences with Trabado et al. 2017 | Tobit ( $\Delta\%$ ) | Studies which found similar associations                                                                                                                                                 | Studies with findings in disagreements with ours                        |
|---------------------------------------------------|--------------------------------------|----------------------|------------------------------------------------------------------------------------------------------------------------------------------------------------------------------------------|-------------------------------------------------------------------------|
| <b>Amino acids positively associated with BMI</b> |                                      |                      |                                                                                                                                                                                          |                                                                         |
| Valine (BCAA)                                     | our results> reference values        | +23.2                | (Bagheri et al., 2019, 2018; Cirulli et al., 2019; Dunn et al., 2015; Ho et al., 2016; Kim et al., 2010; Libert et al., 2018; Newgard et al., 2009; Wang et al., 2018; Xie et al., 2014) |                                                                         |
| Isoleucine (BCAA)                                 |                                      | +20.0                |                                                                                                                                                                                          |                                                                         |
| Leucine (BCAA)                                    | our results> reference values        | +15.0                |                                                                                                                                                                                          |                                                                         |
| Tyrosine (aromatic aa)                            | our results>> reference values       | +29.8                | (Cirulli et al., 2019; Dunn et al., 2015; Ho et al., 2016; Libert et al., 2018; Rangel-Huerta et al., 2019; Wang et al., 2018)                                                           |                                                                         |
| Phenylalanine (aromatic aa)                       | our results>> reference values       | +20.4                |                                                                                                                                                                                          |                                                                         |
| Tryptophan (aromatic aa)                          |                                      |                      |                                                                                                                                                                                          | It was higher in (Kim et al., 2010; Wang et al., 2018; Yu et al., 2018) |
| Alanine (hydrophobic aa)                          | our results> reference values        | +18.9                | (Bagheri et al., 2019; Dunn et al., 2015; Ho et al., 2016; Libert et al., 2018)                                                                                                          |                                                                         |
| Proline (hydrophobic aa)                          |                                      | +18.1                | (Bagheri et al., 2019; Dunn et al., 2015)                                                                                                                                                |                                                                         |
| glutamic acid (negative polar aa)                 | our results>> reference values       | +17.1                | (Bagheri et al., 2019, 2018; Carayol et al., 2017; Wang et al., 2018; Zhao et al., 2016)                                                                                                 |                                                                         |
| Lysine (positive polar aa)                        | our results> reference values        | +7.1                 | (Dunn et al., 2015; Libert et al., 2018)                                                                                                                                                 |                                                                         |
| Ornithine (positive polar aa)                     | our results>> reference values       | +9.2                 | (Dunn et al., 2015)                                                                                                                                                                      |                                                                         |
| <b>Amino acids negatively associated with BMI</b> |                                      |                      |                                                                                                                                                                                          |                                                                         |

|                                                       |                                |       |                                                                                 |                                               |
|-------------------------------------------------------|--------------------------------|-------|---------------------------------------------------------------------------------|-----------------------------------------------|
| Asparagine<br>(uncharged polar aa)                    | reference values>our results   | -16.1 | (Bagheri et al., 2019; Dunn et al., 2015)                                       |                                               |
| Glycine<br>(uncharged polar aa)                       |                                | -13.6 |                                                                                 | It was higher in (Oberbach et al., 2011)      |
| Histidine<br>(Charged polar aa)                       |                                | -11.8 |                                                                                 |                                               |
| Serine<br>(Uncharged polar aa)                        |                                | -10.0 | (Bagheri et al., 2019; Dunn et al., 2015)                                       |                                               |
| Citidine<br>(polar aa)                                |                                | -6.2  |                                                                                 | It was not significant in (Dunn et al., 2015) |
| Threonine<br>(Uncharged polar aa)                     |                                |       |                                                                                 | It was not significant in (Dunn et al., 2015) |
| Arginine<br>(Positive polar aa)                       | reference values>>our results  |       |                                                                                 |                                               |
| <b>Biogenic amines positively associated with BMI</b> |                                |       |                                                                                 |                                               |
| Kynurenine                                            | our results>> reference values | +16.1 | (Carayol et al., 2017; Ho et al., 2016; Zhao et al., 2016)                      |                                               |
| Aminoadipic acid                                      |                                | +18.5 |                                                                                 |                                               |
| 4-hydroxyproline                                      |                                | +8.0  |                                                                                 |                                               |
| <b>Biogenic amines negatively associated with BMI</b> |                                |       |                                                                                 |                                               |
| Serotonin                                             |                                | -7.4  |                                                                                 |                                               |
| Creatinine                                            | reference values>our results   | -6.1  |                                                                                 | Higher in (Dunn et al., 2015)                 |
| N-acetylornithine                                     |                                | -9.2  |                                                                                 |                                               |
| <b>Acylcarnitines positively associated with BMI</b>  |                                |       |                                                                                 |                                               |
| C0                                                    |                                | +12.6 | (Cirulli et al., 2019; Xie et al., 2014)                                        | Lower in (Kim et al., 2010)                   |
| C3                                                    |                                | +12.2 | (Cirulli et al., 2019; Kim et al., 2010; Libert et al., 2018; Xie et al., 2014) |                                               |
| C2                                                    |                                | +9.1  |                                                                                 |                                               |

|                                                      |                               |                    |                                                                                                                                 |                         |
|------------------------------------------------------|-------------------------------|--------------------|---------------------------------------------------------------------------------------------------------------------------------|-------------------------|
| C5                                                   |                               |                    |                                                                                                                                 |                         |
| C18:1                                                | our results> reference values | +5.7 (FDR P=0.070) |                                                                                                                                 |                         |
| <b>Acylcarnitines negatively associated with BMI</b> |                               |                    |                                                                                                                                 |                         |
| C12                                                  |                               | 24.5               |                                                                                                                                 |                         |
| <b>LysoPC positively associated with BMI</b>         |                               |                    |                                                                                                                                 |                         |
| lysoPC a C16:1                                       |                               | +7.3               | (Bagheri et al., 2019)                                                                                                          |                         |
| <b>LysoPC negatively associated with BMI</b>         |                               |                    |                                                                                                                                 |                         |
| lysoPC a C26:0                                       | reference values>>our results |                    |                                                                                                                                 |                         |
| lysoPC a C28:0                                       | reference values>>our results |                    |                                                                                                                                 |                         |
| lysoPC a C18:2                                       | reference values>our results  | -23.3              | (Bagheri et al., 2019, 2018; Carayol et al., 2017; Ho et al., 2016; Tulipani et al., 2016; Wang et al., 2018)                   |                         |
| lysoPC a C28:1                                       | reference values>our results  |                    |                                                                                                                                 |                         |
| lysoPC a C18:1                                       |                               | -15.9              | (Bagheri et al., 2019, 2018; Carayol et al., 2017; Ho et al., 2016; Kim et al., 2010; Tulipani et al., 2016; Wang et al., 2018) |                         |
| lysoPC a C17:0                                       |                               | -14.3              | (Tulipani et al., 2016)                                                                                                         |                         |
| <b>PC aa positively associated with BMI</b>          |                               |                    |                                                                                                                                 |                         |
| PC aa C38:3                                          | our results>reference values  | +21.1              | (Bagheri et al., 2019, 2018; Carayol et al., 2017; Ho et al., 2016)                                                             |                         |
| PC aa C40:4                                          |                               | +14.3              |                                                                                                                                 |                         |
| PC aa C32:1                                          |                               | +12.4              | (Bagheri et al., 2019, 2018; Carayol et al., 2017)                                                                              | (Oberbach et al., 2011) |
| PC aa C38:4                                          |                               | +7.6               | (Carayol et al., 2017)                                                                                                          |                         |
| PC aa C40:5                                          |                               | +6.9               |                                                                                                                                 | (Oberbach et al., 2011) |
| <b>PC aa negatively associated with BMI</b>          |                               |                    |                                                                                                                                 |                         |
| PC aa C38:6                                          | reference values>>our results | -12.9              | (Ho et al., 2016)                                                                                                               |                         |
| PC aa C38:0                                          | reference values>>our results | -11.7              |                                                                                                                                 |                         |

|                                             |                                |       |                        |                                   |
|---------------------------------------------|--------------------------------|-------|------------------------|-----------------------------------|
| PC aa C36:0                                 | reference values>our results   | -11.7 |                        |                                   |
| PC aa C42:5                                 | reference values>>our results  | -11.6 |                        |                                   |
| PC aa C36:6                                 | reference values>>our results  | -10.6 |                        |                                   |
| PC aa C34:2                                 | reference values>>>our results | -10.5 |                        |                                   |
| PC aa C42:1                                 | reference values>>>our results | -10.0 | (Carayol et al., 2017) |                                   |
| PC aa C42:6                                 | reference values>>our results  | -10.5 |                        |                                   |
| PC aa C40:3                                 | reference values>>our results  | -8.8  |                        |                                   |
| PC aa C42:2                                 | reference values>>our results  | -9.6  | (Carayol et al., 2017) |                                   |
| PC aa C42:0                                 | reference values>>>our results | -8.4  | (Carayol et al., 2017) | Higher in (Oberbach et al., 2011) |
| PC aa C40:2                                 | reference values>>our results  | -7.3  |                        |                                   |
| PC aa C28:1                                 |                                |       |                        |                                   |
| <b>PC ae negatively associated with BMI</b> |                                |       |                        |                                   |
| PC ae C36:2                                 | reference values>>our results  | -20.5 |                        |                                   |
| PC ae C34:3                                 | reference values>>our results  | -20.2 | (Bagheri et al., 2019) |                                   |
| PC ae C34:2                                 | reference values>>our results  | -18.2 |                        |                                   |
| PC ae C40:6                                 | reference values>>our results  | -16.1 | (Bagheri et al., 2019) |                                   |
| PC ae C40:1                                 | reference values>>our results  | -16.0 |                        |                                   |
| PC ae C38:0                                 | reference values>>our results  | -15.2 |                        |                                   |

|             |                               |       |                        |  |
|-------------|-------------------------------|-------|------------------------|--|
| PC ae C36:3 | reference values>>our results | -12.3 |                        |  |
| PC ae C42:3 | reference values>>our results | -11.9 | (Carayol et al., 2017) |  |
| PC ae C36:1 | reference values>>our results | -10.6 |                        |  |
| PC ae C30:0 | reference values>>our results | -10.6 |                        |  |
| PC ae C40:5 | reference values>>our results | -10.5 | (Carayol et al., 2017) |  |
| PC ae C42:2 | reference values>>our results | -10.1 |                        |  |
| PC ae C44:6 | reference values>>our results | -10.3 | (Carayol et al., 2017) |  |
| PC ae C34:1 | reference values>>our results | -9.5  |                        |  |
| PC ae C38:6 | reference values>>our results | -9.4  |                        |  |
| PC ae C32:1 | reference values>>our results | -9.0  |                        |  |
| PC ae C42:1 | reference values>>our results | -8.9  |                        |  |
| PC ae C38:5 | reference values>>our results | -8.5  |                        |  |
| PC ae C42:4 | reference values>>our results | -8.4  | (Carayol et al., 2017) |  |
| PC ae C34:0 | reference values>>our results | -7.8  |                        |  |
| PC ae C36:5 | reference values>>our results | -7.9  |                        |  |
| PC ae C44:5 | reference values>>our results | -7.8  | (Carayol et al., 2017) |  |
| PC ae C42:5 | reference values>>our results | -7.2  | (Carayol et al., 2017) |  |

|                                          |                               |       |                                         |  |
|------------------------------------------|-------------------------------|-------|-----------------------------------------|--|
| PC ae C36:0                              | reference values>>our results | -7.1  |                                         |  |
| PC ae C32:2                              | reference values>>our results | -6.7  |                                         |  |
| PC ae C38:4                              | reference values>>our results | -6.9  | (Bagheri et al., 2019)                  |  |
| PC ae C38:2                              | reference values>>our results | -6.1  | (Carayol et al., 2017)                  |  |
| <b>SM positively associated with BMI</b> |                               |       |                                         |  |
| SM C18:1                                 | our results> reference values | 8.3   | (Ho et al., 2016)                       |  |
| SM C16:1                                 |                               | 7.0   | (Ho et al., 2016)                       |  |
| SM C18:0                                 | our results> reference values |       | (Carayol et al., 2017; Ho et al., 2016) |  |
| <b>SM negatively associated with BMI</b> |                               |       |                                         |  |
| SM C24:1                                 |                               | -10.5 |                                         |  |
| SM C16:0                                 |                               | -9.7  |                                         |  |
| SM C26:1                                 | reference values>>our results | -8.9  |                                         |  |
| SM (OH) C22:2                            |                               | -8.3  |                                         |  |
| SM (OH) C16:1                            |                               | -6.7  |                                         |  |
| SM (OH) C14:1                            |                               | -5.9  |                                         |  |
| SM C26:0                                 | reference values>>our results |       |                                         |  |

## References

- Bagheri, M., Djazayery, A., Farzadfar, F., Qi, L., Yekaninejad, M.S., Aslibekyan, S., Chamari, M., Hassani, H., Koletzko, B., Uhl, O., 2019. Plasma metabolomic profiling of amino acids and polar lipids in Iranian obese adults. *Lipids Heal. Dis* 18, 94. <https://doi.org/10.1186/s12944-019-1037-0>
- Bagheri, M., Farzadfar, F., Qi, L., Yekaninejad, M.S., Chamari, M., Zeleznik, O.A., Kalantar, Z., Ebrahimi, Z., Sheidaie, A., Koletzko, B., Uhl, O., Djazayery, A., 2018. Obesity-Related Metabolomic Profiles and Discrimination of Metabolically Unhealthy Obesity. *J Proteome Res* 17, 1452–1462. <https://doi.org/10.1021/acs.jproteome.7b00802>
- Carayol, M., Leitzmann, M.F., Ferrari, P., Zamora-Ros, R., Achaintre, D., Stepien, M., Schmidt, J.A., Travis, R.C., Overvad, K., Tjønneland, A., Hansen, L., Kaaks, R., Kühn, T., Boeing, H., Bachlechner, U., Trichopoulou, A., Bamia, C., Palli, D., Agnoli, C., Tumino, R., Vineis, P., Panico, S., Quirós, J.R., Sánchez-Cantalejo, E., Huerta, J.M., Ardanaz, E., Arriola, L., Agudo, A., Nilsson, J., Melander, O., Bueno-de-Mesquita, B., Peeters, P.H., Wareham, N., Khaw, K.T., Jenab, M., Key, T.J., Scalbert, A., Rinaldi, S., 2017. Blood Metabolic Signatures of Body Mass Index: A Targeted Metabolomics Study in the EPIC Cohort. *J Proteome Res* 16, 3137–3146. <https://doi.org/10.1021/acs.jproteome.6b01062>
- Cirulli, E.T., Guo, L., Leon Swisher, C., Shah, N., Huang, L., Napier, L.A., Kirkness, E.F., Spector, T.D., Caskey, C.T., Thorens, B., Venter, J.C., Telenti, A., 2019. Profound Perturbation of the Metabolome in Obesity Is Associated with Health Risk. *Cell Metab* 29, 488-500.e2. <https://doi.org/10.1016/j.cmet.2018.09.022>
- Dunn, W.B., Lin, W., Broadhurst, D., Begley, P., Brown, M., Zelena, E., Vaughan, A.A., Halsall, A., Harding, N., Knowles, J.D., Francis-McIntyre, S., Tseng, A., Ellis, D.I., O'Hagan, S., Aarons, G., Benjamin, B., Chew-Graham, S., Moseley, C., Potter, P., Winder, C.L., Potts, C., Thornton, P., McWhirter, C., Zubair, M., Pan, M., Burns, A., Cruickshank, J.K., Jayson, G.C., Purandare, N., Wu, F.C., Finn, J.D., Haselden, J.N., Nicholls, A.W., Wilson, I.D., Goodacre, R., Kell, D.B., 2015. Molecular phenotyping of a UK population: defining the human serum metabolome. *Metabolomics* 11, 9–26. <https://doi.org/10.1007/s11306-014-0707-1>
- Ho, J.E., Larson, M.G., Ghorbani, A., Cheng, S., Chen, M.H., Keyes, M., Rhee, E.P., Clish, C.B., Vasan, R.S., Gerszten, R.E., Wang, T.J., 2016. Metabolomic Profiles of Body Mass Index in the Framingham Heart Study Reveal Distinct Cardiometabolic Phenotypes. *PLoS One* 11, e0148361. <https://doi.org/10.1371/journal.pone.0148361>
- Kim, J.Y., Park, J.Y., Kim, O.Y., Ham, B.M., Kim, H.J., Kwon, D.Y., Jang, Y., Lee, J.H., 2010. Metabolic profiling of plasma in overweight/obese and lean men using ultra performance liquid chromatography and Q-TOF mass spectrometry (UPLC-Q-TOF MS). *J Proteome Res* 9, 4368–4375. <https://doi.org/10.1021/pr100101p>
- Libert, D.M., Nowacki, A.S., Natowicz, M.R., 2018. Metabolomic analysis of obesity, metabolic syndrome, and type 2 diabetes: amino acid and acylcarnitine levels change along a spectrum of metabolic wellness. *PeerJ* 6, e5410. <https://doi.org/10.7717/peerj.5410>
- Newgard, C.B., An, J., Bain, J.R., Muehlbauer, M.J., Stevens, R.D., Lien, L.F., Haqq, A.M., Shah, S.H., Arlotto, M., Slentz, C.A., Rochon, J., Gallup, D., Ilkayeva, O., Wenner, B.R., Yancy, W.S., Eisenson, H., Musante, G., Surwit, R.S., Millington, D.S., Butler, M.D., Svetkey, L.P., 2009. A branched-chain amino acid-related metabolic signature that differentiates obese and lean humans and contributes to insulin resistance. *Cell Metab* 9, 311–326.

<https://doi.org/10.1016/j.cmet.2009.02.002>

- Oberbach, A., Blüher, M., Wirth, H., Till, H., Kovacs, P., Kullnick, Y., Schlichting, N., Tomm, J.M., Rolle-Kampczyk, U., Murugaiyan, J., Binder, H., Dietrich, A., von Bergen, M., 2011. Combined proteomic and metabolomic profiling of serum reveals association of the complement system with obesity and identifies novel markers of body fat mass changes. *J Proteome Res* 10, 4769–4788. <https://doi.org/10.1021/pr2005555>
- Rangel-Huerta, O.D., Pastor-Villaescusa, B., Gil, A., 2019. Are we close to defining a metabolomic signature of human obesity? A systematic review of metabolomics studies. *Metabolomics* 15, 93. <https://doi.org/10.1007/s11306-019-1553-y>
- Trabado, S., Al-Salameh, A., Croixmarie, V., Masson, P., Corruble, E., Fève, B., Colle, R., Ripoll, L., Walther, B., Boursier-Neyret, C., Werner, E., Becquemont, L., Chanson, P., 2017. The human plasma-metabolome: Reference values in 800 French healthy volunteers; impact of cholesterol, gender and age. *PLoS One* 12, e0173615. <https://doi.org/10.1371/journal.pone.0173615>
- Tulipani, S., Palau-Rodriguez, M., Miñarro Alonso, A., Cardona, F., Marco-Ramell, A., Zonja, B., de Alda, M., Muñoz-Garach, A., Sanchez-Pla, A., Tinahones, F.J., Andres-Lacueva, C., 2016. Biomarkers of Morbid Obesity and Prediabetes by Metabolomic Profiling of Human Discordant Phenotypes. *Clin Chim Acta* 463, 53–61. <https://doi.org/10.1016/j.cca.2016.10.005>
- Wang, S.M., Yang, R.Y., Wang, M., Ji, F.S., Li, H.X., Tang, Y.M., Chen, W.X., Dong, J., 2018. Identification of serum metabolites associated with obesity and traditional risk factors for metabolic disease in Chinese adults. *Nutr Metab Cardiovasc Dis* 28, 112–118. <https://doi.org/10.1016/j.numecd.2017.09.009>
- Xie, G., Ma, X., Zhao, A., Wang, C., Zhang, Y., Nieman, D., Nicholson, J.K., Jia, W., Bao, Y., 2014. The metabolite profiles of the obese population are gender-dependent. *J Proteome Res* 13, 4062–4073. <https://doi.org/10.1021/pr500434s>
- Yu, H.T., Fu, X.Y., Xu, B., Zuo, L.L., Ma, H.B., Wang, S.R., 2018. Untargeted metabolomics approach (UPLC-Q-TOF-MS) explores the biomarkers of serum and urine in overweight/obese young men. *Asia Pac J Clin Nutr* 27, 1067–1076. <https://doi.org/10.6133/apjcn.052018.07>
- Zhao, Q., Zhu, Y., Best, L.G., Umans, J.G., Uppal, K., Tran, V.T., Jones, D.P., Lee, E.T., Howard, B. V, Zhao, J., 2016. Metabolic Profiles of Obesity in American Indians: The Strong Heart Family Study. *PLoS One* 11, e0159548. <https://doi.org/10.1371/journal.pone.0159548>
