# Supplementary material for: Plasma Metabolomic Profiling in 1391 Subjects with Overweight and Obesity from the SPHERE Study
Source: MDPI journal article supplement (doi:10.3390/metabo11040194), 2021-03-24
Supplement: s1 [file s1]

## Supplementary material

**Table S2** – Results obtained from the analyses of the 21 amino acids and the sugar. Results are reported as mean, standard deviation, 25th and 75th percentile (inter-quartile range), minimum and maximum (extreme values). For each compound the limit of detection is reported along with the number of subjects with quantifiable concentrations.

|                 | Mean±SD (μmol/L) | Median | Inter-quartile Range | Extreme values  | LOD  | N<LOD (%) |
|-----------------|------------------|--------|----------------------|-----------------|------|-----------|
| L-Alanine       | 367.52±84.57     | 361.00 | [308.00;418.00]      | (167.00;755.00) | 1.00 | 0 (0%)    |
| L-Arginine      | 53.61±17.83      | 51.90  | [41.20;64.33]        | (8.57;128.00)   | 0.50 | 0 (0%)    |
| L-Asparagine    | 42.74±8.66       | 42.00  | [36.75;47.90]        | (18.80;104.00)  | 0.46 | 0 (0%)    |
| L-Aspartic acid | 7.67±5.22        | 6.84   | [4.90;9.42]          | (<LOD;129.00)   | 0.91 | 42 (3%)   |
| L-Citrulline    | 29.27±8.79       | 28.30  | [23.60;33.90]        | (<LOD;100.00)   | 0.40 | 1 (0.1%)  |
| L-Glutamine     | 623.17±118.03    | 624.00 | [554.00;701.00]      | (61.90;1025.00) | 0.53 | 0 (0%)    |
| L-Glutamic acid | 87.83±44.65      | 80.10  | [58.80;107.00]       | (13.90;628.00)  | 0.55 | 0 (0%)    |
| Glycine         | 239.56±76.05     | 225.00 | [190.00;271.00]      | (74.60;748.00)  | 0.08 | 0 (0%)    |
| L-Histidine     | 85.93±13.93      | 85.20  | [76.40;94.55]        | (26.90;182.00)  | 0.50 | 0 (0%)    |
| L-Isoleucine    | 86.02±22.09      | 82.50  | [71.18;96.93]        | (32.80;210.00)  | 0.33 | 0 (0%)    |
| L-Leucine       | 174.24±43.26     | 168.00 | [146.00;195.00]      | (68.20;603.00)  | 1.50 | 0 (0%)    |
| L-Lysine        | 232.73±70.39     | 235.00 | [184.00;279.00]      | (68.50;470.00)  | 0.50 | 0 (0%)    |
| L-Methionine    | 25.67±6.75       | 24.90  | [21.88;28.60]        | (10.10;135.00)  | 0.10 | 0 (0%)    |
| L-Ornithine     | 110.68±33.97     | 107.00 | [86.15;130.00]       | (33.30;310.00)  | 0.50 | 0 (0%)    |
| L-Phenylalanine | 73.58±14.38      | 72.10  | [63.40;81.20]        | (40.90;169.00)  | 0.02 | 0 (0%)    |
| L-Proline       | 205.63±74.60     | 191.00 | [154.00;239.00]      | (72.00;618.00)  | 0.49 | 0 (0%)    |
| L-Serine        | 114.58±27.07     | 112.00 | [96.10;130.25]       | (35.60;295.00)  | 0.79 | 0 (0%)    |
| L-Threonine     | 128.64±33.25     | 124.00 | [106.00;145.00]      | (60.40;355.00)  | 0.40 | 0 (0%)    |
| L-Tryptophan    | 66.51±14.15      | 65.45  | [56.30;75.50]        | (28.50;126.00)  | 0.06 | 0 (0%)    |
| L-Tyrosine      | 80.35±22.39      | 78.25  | [65.50;92.55]        | (25.50;275.00)  | 0.01 | 0 (0%)    |

|          |                 |         |                   |                    |        |        |
|----------|-----------------|---------|-------------------|--------------------|--------|--------|
| L-Valine | 288.24±60.81    | 282.00  | [246.00;326.25]   | (133.00;548.00)    | 0.50   | 0 (0%) |
| hexose   | 4976.99±1301.73 | 4763.50 | [4288.25;5239.00] | (2838.00;24381.00) | 276.00 | 0 (0%) |

SD = standard deviation, LOD = limit of detection, LLOQ = lower limit of quantitation

**Table S3** – Results obtained from the analyses of the 21 biogenic amines. Results are reported as mean, standard deviation, 25th and 75th percentile (inter-quartile range), minimum and maximum (extreme values). For each compound the limit of detection is reported along with the number of subjects with quantifiable concentrations.

|                             | Mean±SD (μmol/L) | Median | Inter-quartile Range | Extreme values | LOD   | N<LOD (%)    |
|-----------------------------|------------------|--------|----------------------|----------------|-------|--------------|
| N-Acetylornithine           | 0.80±1.26        | 0.55   | [<LOD;1.05]          | (<LOD;25.90)   | 0.05  | 441 (31.7%)  |
| Asymmetric dimethylarginine | 0.37±0.55        | 0.38   | [<LOD;0.56]          | (<LOD;15.50)   | 0.08  | 540 (38.8%)  |
| Alpha-Aminoadipic acid      | 0.61±0.64        | 0.45   | [<LOD;0.98]          | (<LOD;5.89)    | 0.08  | 595 (42.7%)  |
| cis-4-Hydroxy-L-proline     | 0.13±0.61        | <LOD   | <LOD                 | (<LOD;18.30)   | 0.10  | 1278 (91.7%) |
| Carnosine                   | 0.03±0.04        | <LOD   | <LOD                 | (<LOD;0.98)    | 0.02  | 1337 (96%)   |
| Creatinine                  | 60.46±21.39      | 58.05  | [50.40;66.60]        | (10.40;609.00) | 0.002 | 0 (0%)       |
| L-Dopa                      | 0.22±0.73        | <LOD   | [<LOD;0.45]          | (<LOD;24.50)   | 0.001 | 881 (63.2%)  |
| Dopamine                    | 0.12±0.34        | <LOD   | <LOD                 | (<LOD;12.40)   | 0.10  | 1243 (89.2%) |
| Histamine                   | 0.09±0.21        | <LOD   | <LOD                 | (<LOD;0.91)    | 0.01  | 1167 (83.8%) |
| L-Kynurenine                | 2.94±1.15        | 2.82   | [2.35;3.37]          | (0.23;31.90)   | 0.01  | 0 (0%)       |
| Methionine sulfoxide        | 0.60±0.88        | <LOD   | [<LOD;0.76]          | (<LOD;26.80)   | 0.30  | 867 (62.2%)  |
| 3-Nitrotyrosine             | <LOD             | <LOD   | <LOD                 | (<LOD;0.37)    | 0.06  | 1378 (98.9%) |
| 1-Phenylethylamine          | 0.03±0.20        | <LOD   | <LOD                 | (<LOD;7.37)    | 0.02  | 1389 (99.7%) |
| Putrescine                  | 0.08±0.18        | 0.06   | [<LOD;0.11]          | (<LOD;6.01)    | 0.001 | 484 (34.7%)  |
| Symmetric dimethylarginine  | 0.37±2.03        | 0.29   | [<LOD;0.53]          | (<LOD;74.50)   | 0.01  | 646 (46.4%)  |
| Serotonin                   | 0.43±0.56        | 0.33   | [0.20;0.53]          | (<LOD;14.70)   | 0.01  | 66 (4.7%)    |
| Spermidine                  | 0.25±0.20        | 0.23   | [<LOD;0.35]          | (<LOD;4.63)    | 0.08  | 468 (33.6%)  |
| Spermine                    | 0.11±0.10        | <LOD   | <LOD                 | (<LOD;1.79)    | 0.08  | 1125 (80.8%) |
| 4-Hydroxyproline            | 10.09±6.15       | 8.39   | [6.40;11.90]         | (2.10;70.00)   | 0.07  | 0 (0%)       |
| Taurine                     | 106.56±51.33     | 94.60  | [74.60;123.00]       | (30.30;472.00) | 0.06  | 0 (0%)       |
| Total dimethylarginine      | 0.99±0.49        | 1.01   | [0.85;1.15]          | (<LOD;10.30)   | 0.01  | 101 (7.3%)   |

SD = standard deviation, LOD = limit of detection, LLOQ = lower limit of quantitation

**Table S4** - Results obtained from the analyses of the 40 acylcarnitines. Results are reported as mean, standard deviation, 25th and 75th percentile (inter-quartile range), minimum and maximum (extreme values). For each compound the limit of detection is reported along with the number of subjects with quantifiable concentrations.

|                                                                           | Mean±SD<br>(μmol/L) | Median | Inter-<br>quartile<br>Range | Extreme<br>values | LOD  | N<LOD (%)    |
|---------------------------------------------------------------------------|---------------------|--------|-----------------------------|-------------------|------|--------------|
| L-Carnitine (C0)                                                          | 32.66±7.26          | 32.15  | [27.70;37.10]               | (12.00;73.20)     | 1.59 | 0 (0%)       |
| Acetylcarnitine (C2)                                                      | 5.83±1.96           | 5.48   | [4.43;6.86]                 | (1.87;19.80)      | 0.11 | 0 (0%)       |
| Propionylcarnitine (C3)                                                   | 0.36±0.12           | 0.34   | [0.28;0.42]                 | (<LOD;1.30)       | 0.05 | 7 (0.5%)     |
| Hydroxybutyrylcarnitine (C3-DC<br>(C4-OH))                                | <LOD                | <LOD   | <LOD                        | (<LOD;0.30)       | 0.04 | 1163 (83.5%) |
| Hydroxypropionylcarnitine (C3-<br>OH)                                     | 0.26±0.16           | <LOD   | <LOD                        | (<LOD;2.76)       | 0.25 | 1306 (93.8%) |
| Propenoylcarnitine (C3:1)                                                 | <LOD                | <LOD   | <LOD                        | (<LOD;0.60)       | 0.07 | 1323 (95%)   |
| Butyrylcarnitine (C4)                                                     | 0.20±0.13           | 0.18   | [<LOD;0.25]                 | (<LOD;1.33)       | 0.10 | 480 (34.5%)  |
| Butenylcarnitine (C4:1)                                                   | <LOD                | <LOD   | <LOD                        | (<LOD;1.29)       | 0.06 | 1333 (95.7%) |
| Valerylcarnitine (C5)                                                     | 0.16±0.11           | <LOD   | [<LOD;0.17]                 | (<LOD;3.86)       | 0.14 | 978 (70.1%)  |
| Glutaryl carnitine<br>(Hydroxyhexanoylcarnitine) (C5-<br>DC (C6-OH))      | <LOD                | <LOD   | <LOD                        | (<LOD;0.13)       | 0.05 | 1269 (91.1%) |
| Methylglutaryl carnitine (C5-M-<br>DC)                                    | <LOD                | <LOD   | <LOD                        | (<LOD;0.14)       | 0.05 | 1275 (91.5%) |
| Hydroxyvalerylcarnitine<br>(Methylmalonylcarnitine) (C5-<br>OH (C3-DC-M)) | <LOD                | <LOD   | <LOD                        | (<LOD;0.23)       | 0.09 | 1283 (92.1%) |
| Tiglylcarnitine (C5:1)                                                    | 0.08±0.12           | <LOD   | <LOD                        | (<LOD;1.54)       | 0.07 | 1293 (92.8%) |
| Glutaconylcarnitine (C5:1-DC)                                             | <LOD                | <LOD   | <LOD                        | (<LOD;0.10)       | 0.05 | 1326 (95.2%) |
| Hexanoylcarnitine<br>(Fumaryl carnitine) (C6 (C4:1-<br>DC))               | 0.08±0.03           | <LOD   | <LOD                        | (<LOD;0.84)       | 0.07 | 1108 (79.5%) |
| Hexenoylcarnitine (C6:1)                                                  | <LOD                | <LOD   | <LOD                        | (<LOD;0.13)       | 0.05 | 1334 (95.8%) |

|                                            |           |      |             |             |      |              |
|--------------------------------------------|-----------|------|-------------|-------------|------|--------------|
| Pimelylcarnitine (C7-DC)                   | 0.04±0.01 | <LOD | <LOD        | (<LOD;0.16) | 0.03 | 1156 (83%)   |
| Octanoylcarnitine (C8)                     | 0.19±0.11 | <LOD | [<LOD;0.22] | (<LOD;2.23) | 0.14 | 902 (64.8%)  |
| Nonaylcarnitine (C9)                       | <LOD      | <LOD | <LOD        | (<LOD;0.38) | 0.06 | 1374 (98.6%) |
| Decanoylcarnitine (C10)                    | 0.53±0.12 | <LOD | <LOD        | (<LOD;2.85) | 0.51 | 1349 (96.8%) |
| Decenoylcarnitine (C10:1)                  | 0.12±0.04 | <LOD | <LOD        | (<LOD;0.45) | 0.11 | 1154 (82.8%) |
| Decadienylcarnitine (C10:2)                | <LOD      | <LOD | <LOD        | (<LOD;0.21) | 0.09 | 1384 (99.4%) |
| Dodecanoylcarnitine (C12)                  | 0.10±0.04 | <LOD | <LOD        | (<LOD;0.45) | 0.08 | 1071 (76.9%) |
| Dodecanedioylcarnitine (C12-DC)            | <LOD      | <LOD | <LOD        | <LOD        | 0.66 | 1384 (99.4%) |
| Dodecenoylcarnitine (C12:1)                | 0.14±0.08 | 0.11 | [<LOD;0.18] | (<LOD;0.73) | 0.08 | 638 (45.8%)  |
| Tetradecanoylcarnitine (C14)               | <LOD      | <LOD | <LOD        | (<LOD;0.32) | 0.08 | 1389 (99.7%) |
| Hydroxytetradecenoylcarnitine (C14:1-OH)   | <LOD      | <LOD | <LOD        | (<LOD;0.10) | 0.03 | 1371 (98.4%) |
| Tetradecenoylcarnitine (C14:1)             | 0.09±0.07 | 0.08 | [0.05;0.12] | (<LOD;1.12) | 0.02 | 316 (22.7%)  |
| Tetradecadienylcarnitine (C14:2)           | <LOD      | <LOD | <LOD        | (<LOD;0.21) | 0.03 | 1162 (83.4%) |
| Hydroxytetradecadienylcarnitine (C14:2-OH) | <LOD      | <LOD | <LOD        | (<LOD;0.14) | 0.03 | 1338 (96.1%) |
| Hexadecanoylcarnitine (C16)                | 0.11±0.06 | 0.11 | [<LOD;0.15] | (<LOD;0.53) | 0.05 | 591 (42.4%)  |
| Hydroxyhexadecanoylcarnitine (C16-OH)      | <LOD      | <LOD | <LOD        | (<LOD;0.16) | 0.07 | 1388 (99.6%) |
| Hydroxyhexadecenoylcarnitine (C16:1-OH)    | <LOD      | <LOD | <LOD        | (<LOD;1.45) | 0.03 | 1374 (98.6%) |
| Hexadecenoylcarnitine (C16:1)              | <LOD      | <LOD | <LOD        | (<LOD;0.22) | 0.04 | 1298 (93.2%) |
| Hexadecadienylcarnitine (C16:2)            | <LOD      | <LOD | <LOD        | (<LOD;0.07) | 0.03 | 1304 (93.6%) |
| Hydroxyhexadecadienylcarnitine (C16:2-OH)  | <LOD      | <LOD | <LOD        | (<LOD;0.09) | 0.04 | 1330 (95.5%) |
| Octadecanoylcarnitine (C18)                | <LOD      | <LOD | <LOD        | (<LOD;0.28) | 0.04 | 1273 (91.4%) |
| Octadecenoylcarnitine (C18:1)              | 0.15±0.04 | 0.14 | [0.12;0.17] | (<LOD;0.30) | 0.04 | 12 (0.9%)    |

|                                         |           |      |             |             |      |             |
|-----------------------------------------|-----------|------|-------------|-------------|------|-------------|
| Hydroxyoctadecenoylcarnitine (C18:1-OH) | <LOD      | <LOD | <LOD        | (<LOD;0.09) | 0.09 | 1393 (100%) |
| Octadecadienylcarnitine (C18:2)         | 0.05±0.02 | 0.04 | [<LOD;0.06] | (<LOD;0.20) | 0.03 | 647 (46.4%) |

SD = standard deviation, LOD = limit of detection

**Table S5** - Results obtained from the analyses of the 14 lysophosphatidylcholine. Results are reported as mean, standard deviation, 25th and 75th percentile (inter-quartile range), minimum and maximum (extreme values). For each compound the limit of detection is reported along with the number of subjects with quantifiable concentrations.

|                | Mean±SD (μmol/L) | Median | Inter-quartile Range | Extreme values | LOD   | N<LOD (%)   |
|----------------|------------------|--------|----------------------|----------------|-------|-------------|
| lysoPC a C14:0 | <LOD             | <LOD   | <LOD                 | <LOD           | 12.10 | 1393 (100%) |
| lysoPC a C16:0 | 85.84±21.44      | 83.10  | [70.88;97.40]        | (39.20;211.00) | 0.43  | 0 (0%)      |
| lysoPC a C16:1 | 2.63±0.86        | 2.51   | [2.02;3.02]          | (0.93;7.80)    | 0.07  | 0 (0%)      |
| lysoPC a C17:0 | 1.51±0.45        | 1.46   | [1.17;1.76]          | (0.50;3.31)    | 0.05  | 0 (0%)      |
| lysoPC a C18:0 | 26.74±7.64       | 25.80  | [21.50;30.90]        | (6.46;62.00)   | 0.27  | 0 (0%)      |
| lysoPC a C18:1 | 16.76±4.84       | 16.10  | [13.30;19.30]        | (5.47;45.60)   | 0.16  | 0 (0%)      |
| lysoPC a C18:2 | 18.51±6.03       | 17.45  | [14.40;21.80]        | (6.33;48.30)   | 0.16  | 0 (0%)      |
| lysoPC a C20:3 | 2.12±0.62        | 2.05   | [1.69;2.46]          | (0.88;5.21)    | 0.15  | 0 (0%)      |
| lysoPC a C20:4 | 5.38±1.65        | 5.18   | [4.21;6.28]          | (1.47;12.80)   | 0.05  | 0 (0%)      |
| lysoPC a C24:0 | 0.23±0.14        | 0.24   | [0.15;0.32]          | (<LOD;0.80)    | 0.03  | 327 (23.5%) |
| lysoPC a C26:0 | 0.13±0.06        | 0.11   | [0.09; 0.16]         | (<LOD;0.46)    | 0.03  | 85 (6.1%)   |
| lysoPC a C26:1 | 0.08±0.06        | 0.07   | [<LOD; 0.12]         | (<LOD;0.38)    | 0.02  | 590 (42.4%) |
| lysoPC a C28:0 | 0.16±0.12        | 0.14   | [0.10;0.18]          | (<LOD;1.29)    | 0.06  | 151 (10.8%) |
| lysoPC a C28:1 | 0.22±0.15        | 0.18   | [0.12;0.32]          | (<LOD;0.90)    | 0.03  | 198 (14.2%) |

SD = standard deviation, LOD = limit of detection

**Table S6** - Results obtained from the analyses of the 76 phosphatidylcholines. Results are reported as mean, standard deviation, 25th and 75th percentile (inter-quartile range), minimum and maximum (extreme values). For each compound the limit of detection is reported along with the number of subjects with quantifiable concentrations.

|             | Mean±SD (μmol/L) | Median | Inter-quartile Range | Extreme values | LOD  | N<LOD (%)   |
|-------------|------------------|--------|----------------------|----------------|------|-------------|
| PC aa C24:0 | 0.17±0.10        | 0.14   | [0.10;0.21]          | (<LOD;0.99)    | 0.07 | 216 (15.5%) |
| PC aa C26:0 | 0.53±0.43        | 0.42   | [<LOD; 0.70]         | (<LOD;3.26)    | 0.80 | 509 (36.5%) |
| PC aa C28:1 | 2.76±0.86        | 2.69   | [2.22;3.24]          | (<LOD;6.49)    | 0.06 | 29 (2.1%)   |
| PC aa C30:0 | 3.68±1.31        | 3.51   | [2.73;4.44]          | (0.91;10.90)   | 0.07 | 0 (0%)      |
| PC aa C30:2 | 0.04±0.06        | <LOD   | [<LOD;0.06]          | (<LOD;0.77)    | 0.01 | 865 (62.1%) |
| PC aa C32:0 | 12.10±3.10       | 11.80  | [10.00;14.00]        | (4.28;25.60)   | 0.06 | 0 (0%)      |
| PC aa C32:1 | 13.95±7.19       | 12.60  | [8.94;16.93]         | (1.81;61.30)   | 0.03 | 0 (0%)      |
| PC aa C32:2 | 3.47±1.45        | 3.28   | [2.44;4.16]          | (0.59;10.50)   | 0.01 | 0 (0%)      |
| PC aa C32:3 | 0.34±0.09        | 0.32   | [0.27;0.39]          | (0.13;0.74)    | 0.01 | 0 (0%)      |
| PC aa C34:1 | 200.32±53.12     | 196.00 | [163.00;232.25]      | (70.70;480.00) | 0.20 | 0 (0%)      |
| PC aa C34:2 | 274.97±58.21     | 273.50 | [235.00;310.00]      | (90.80;600.00) | 0.21 | 0 (0%)      |
| PC aa C34:3 | 10.86±3.35       | 10.50  | [8.44;12.70]         | (3.44;35.30)   | 0.13 | 0 (0%)      |
| PC aa C34:4 | 1.34±0.49        | 1.28   | [0.99;1.61]          | (0.28;4.18)    | 0.01 | 0 (0%)      |
| PC aa C36:0 | 1.80±0.78        | 1.64   | [1.25;2.20]          | (<LOD;6.35)    | 0.31 | 8 (0.6%)    |
| PC aa C36:1 | 52.91±16.64      | 50.65  | [41.20;62.50]        | (17.10;135.00) | 0.09 | 0 (0%)      |
| PC aa C36:2 | 200.41±44.99     | 198.00 | [168.00;230.00]      | (75.00;377.00) | 0.11 | 0 (0%)      |
| PC aa C36:3 | 124.52±31.90     | 122.00 | [103.00;142.00]      | (46.10;272.00) | 0.07 | 0 (0%)      |
| PC aa C36:4 | 157.57±42.23     | 153.00 | [127.00;182.00]      | (64.90;450.00) | 0.07 | 0 (0%)      |
| PC aa C36:5 | 16.89±10.13      | 14.50  | [10.60;20.30]        | (3.35;107.00)  | 0.03 | 0 (0%)      |
| PC aa C36:6 | 0.72±0.29        | 0.67   | [0.50;0.86]          | (0.16;2.75)    | 0.02 | 0 (0%)      |
| PC aa C38:0 | 2.36±0.76        | 2.22   | [1.82;2.78]          | (0.76;6.96)    | 0.04 | 0 (0%)      |
| PC aa C38:1 | 0.97±1.40        | 0.61   | [0.32;1.06]          | (<LOD;24.90)   | 0.01 | 150 (10.8%) |



|             |             |       |                |                |       |              |
|-------------|-------------|-------|----------------|----------------|-------|--------------|
| PC aa C38:3 | 52.23±15.21 | 51.30 | [41.10;61.23]  | (15.00;135.00) | 0.06  | 0 (0%)       |
| PC aa C38:4 | 96.50±26.26 | 93.65 | [77.48;113.00] | (35.90;237.00) | 0.05  | 0 (0%)       |
| PC aa C38:5 | 39.94±11.27 | 38.40 | [31.78;46.63]  | (16.40;94.80)  | 0.04  | 0 (0%)       |
| PC aa C38:6 | 59.65±20.59 | 56.25 | [45.20;70.83]  | (18.00;172.00) | 0.04  | 0 (0%)       |
| PC aa C40:1 | 0.19±0.10   | <LOD  | <LOD           | (<LOD;0.99)    | 0.15  | 1104 (79.3%) |
| PC aa C40:2 | 0.21±0.14   | 0.19  | [0.16;0.23]    | (<LOD;2.09)    | 0.02  | 2 (0.1%)     |
| PC aa C40:3 | 0.38±0.14   | 0.35  | [0.30;0.42]    | (0.15;1.75)    | 0.01  | 0 (0%)       |
| PC aa C40:4 | 2.85±0.93   | 2.71  | [2.19;3.38]    | (0.85;8.22)    | 0.02  | 0 (0%)       |
| PC aa C40:5 | 7.68±2.42   | 7.30  | [5.94;9.16]    | (2.43;18.80)   | 0.01  | 0 (0%)       |
| PC aa C40:6 | 23.10±8.28  | 21.55 | [17.40;27.83]  | (7.39;77.90)   | 0.25  | 0 (0%)       |
| PC aa C42:0 | 0.35±0.09   | 0.34  | [0.29;0.40]    | (<LOD;0.74)    | 0.05  | 2 (0.1%)     |
| PC aa C42:1 | 0.13±0.04   | 0.13  | [0.11;0.15]    | (<LOD;0.32)    | 0.01  | 6 (0.4%)     |
| PC aa C42:2 | 0.16±0.06   | 0.16  | [0.14;0.20]    | (<LOD;0.41)    | 0.03  | 149 (10.7%)  |
| PC aa C42:4 | 0.13±0.04   | 0.12  | [0.10;0.14]    | (<LOD;0.46)    | 0.02  | 9 (0.6%)     |
| PC aa C42:5 | 0.18±0.05   | 0.18  | [0.15;0.21]    | (<LOD;0.63)    | 0.003 | 2 (0.1%)     |
| PC aa C42:6 | 0.27±0.08   | 0.26  | [0.21;0.32]    | (<LOD;0.73)    | 0.17  | 158 (11.3%)  |
| PC ae C30:0 | 0.28±0.09   | 0.27  | [0.22;0.33]    | (<LOD;0.74)    | 0.05  | 3 (0.2%)     |
| PC ae C30:1 | 0.09±0.07   | 0.08  | [0.04;0.12]    | (<LOD;0.50)    | 0.01  | 223 (16%)    |
| PC ae C30:2 | 0.10±0.03   | 0.09  | [0.08;0.11]    | (<LOD;0.24)    | 0.01  | 5 (0.4%)     |
| PC ae C32:1 | 2.39±0.61   | 2.33  | [1.96;2.77]    | (0.87;4.83)    | 0.01  | 0 (0%)       |
| PC ae C32:2 | 0.65±0.18   | 0.62  | [0.53;0.75]    | (0.25;1.53)    | 0.06  | 0 (0%)       |
| PC ae C34:0 | 1.17±0.35   | 1.12  | [0.92;1.36]    | (0.35;2.76)    | 0.03  | 0 (0%)       |
| PC ae C34:1 | 8.31±2.04   | 8.10  | [6.87;9.58]    | (2.96;18.60)   | 0.02  | 0 (0%)       |
| PC ae C34:2 | 9.15±2.62   | 8.85  | [7.30;10.70]   | (2.95;22.50)   | 0.02  | 0 (0%)       |
| PC ae C34:3 | 5.90±1.93   | 5.69  | [4.52;6.98]    | (1.99;14.90)   | 0.04  | 0 (0%)       |
| PC ae C36:0 | 0.63±0.16   | 0.62  | [0.52;0.73]    | (<LOD;1.32)    | 0.13  | 1 (0.1%)     |

|             |            |       |               |              |       |              |
|-------------|------------|-------|---------------|--------------|-------|--------------|
| PC ae C36:1 | 5.60±1.52  | 5.37  | [4.56;6.42]   | (2.07;16.50) | 0.06  | 0 (0%)       |
| PC ae C36:2 | 10.30±2.64 | 9.98  | [8.39;11.90]  | (4.15;20.80) | 0.02  | 0 (0%)       |
| PC ae C36:3 | 6.10±1.66  | 5.94  | [4.92;7.06]   | (2.29;13.60) | 0.01  | 0 (0%)       |
| PC ae C36:4 | 16.61±4.45 | 16.20 | [13.50;19.10] | (6.77;42.90) | 0.14  | 0 (0%)       |
| PC ae C36:5 | 10.15±3.01 | 9.71  | [8.02;11.80]  | (3.90;26.00) | 0.02  | 0 (0%)       |
| PC ae C38:0 | 1.90±0.66  | 1.78  | [1.46;2.25]   | (0.58;5.90)  | 0.08  | 0 (0%)       |
| PC ae C38:1 | 0.31±0.36  | 0.26  | [0.11;0.42]   | (<LOD;4.35)  | 0.003 | 227 (16.3%)  |
| PC ae C38:2 | 1.34±0.56  | 1.21  | [1.01;1.53]   | (0.50;6.60)  | 0.02  | 0 (0%)       |
| PC ae C38:3 | 2.91±1.00  | 2.74  | [2.29;3.31]   | (0.97;12.40) | 0.02  | 0 (0%)       |
| PC ae C38:4 | 10.90±2.54 | 10.70 | [9.03;12.40]  | (4.05;21.80) | 0.14  | 0 (0%)       |
| PC ae C38:5 | 13.76±3.26 | 13.30 | [11.40;15.90] | (6.65;26.00) | 0.03  | 0 (0%)       |
| PC ae C38:6 | 6.16±1.82  | 5.91  | [4.88;7.15]   | (2.36;16.90) | 0.01  | 0 (0%)       |
| PC ae C40:1 | 0.95±0.27  | 0.92  | [0.75;1.11]   | (0.31;2.06)  | 0.01  | 0 (0%)       |
| PC ae C40:2 | 1.21±0.35  | 1.16  | [0.98;1.39]   | (0.43;3.57)  | 0.03  | 0 (0%)       |
| PC ae C40:3 | 0.72±0.35  | 0.65  | [0.55;0.76]   | (0.26;4.08)  | 0.02  | 0 (0%)       |
| PC ae C40:4 | 1.52±0.41  | 1.47  | [1.26;1.68]   | (0.54;4.87)  | 0.09  | 0 (0%)       |
| PC ae C40:5 | 2.14±0.57  | 2.05  | [1.77;2.40]   | (0.99;6.63)  | 0.02  | 0 (0%)       |
| PC ae C40:6 | 3.27±0.96  | 3.12  | [2.58;3.82]   | (1.29;8.08)  | 0.02  | 0 (0%)       |
| PC ae C42:0 | <LOD       | <LOD  | <LOD          | (<LOD;1.38)  | 0.67  | 1380 (99.1%) |
| PC ae C42:1 | 0.24±0.07  | 0.23  | [0.19;0.27]   | (<LOD;0.84)  | 0.07  | 26 (1.9%)    |
| PC ae C42:2 | 0.37±0.10  | 0.36  | [0.30;0.43]   | (0.13;1.01)  | 0.02  | 0 (0%)       |
| PC ae C42:3 | 0.49±0.13  | 0.47  | [0.41;0.55]   | (0.22;1.19)  | 0.03  | 0 (0%)       |
| PC ae C42:4 | 0.55±0.13  | 0.53  | [0.46;0.61]   | (0.24;1.28)  | 0.02  | 0 (0%)       |
| PC ae C42:5 | 1.38±0.32  | 1.34  | [1.16;1.54]   | (<LOD;3.33)  | 0.64  | 4 (0.3%)     |
| PC ae C44:3 | 0.05±0.04  | 0.04  | (<LOD;0.06]   | (<LOD;0.38)  | 0.08  | 626 (44.9%)  |
| PC ae C44:4 | 0.21±0.05  | 0.20  | [0.17;0.24]   | (<LOD;0.54)  | 0.04  | 2 (0.1%)     |

|             |           |      |             |             |      |          |
|-------------|-----------|------|-------------|-------------|------|----------|
| PC ae C44:5 | 1.22±0.32 | 1.18 | [0.99;1.40] | (<LOD;3.91) | 0.03 | 1 (0.1%) |
| PC ae C44:6 | 0.85±0.21 | 0.82 | [0.70;0.97] | (0.36;2.23) | 0.08 | 0 (0%)   |

aa: Diacylphosphatidylcholine – ae: Acylalkylphosphatidylcholine

SD = standard deviation, LOD = limit of detection

**Table S7** - Results obtained from the analyses of the 15 sphingomyelin. Results are reported as mean, standard deviation, 25th and 75th percentile (inter-quartile range), minimum and maximum (extreme values). For each compound the limit of detection is reported along with the number of subjects with quantifiable concentrations.

|               | Mean±SD (μmol/L) | Median | Inter-quartile Range | Extreme values  | LOD   | N<LOD (%)   |
|---------------|------------------|--------|----------------------|-----------------|-------|-------------|
| SM (OH) C14:1 | 6.89±1.85        | 6.74   | [5.59;7.90]          | (2.52;16.30)    | 0.02  | 0 (0%)      |
| SM (OH) C16:1 | 3.76±1.04        | 3.61   | [3.03;4.36]          | (1.35;8.60)     | 0.004 | 0 (0%)      |
| SM (OH) C22:1 | 14.68±3.99       | 14.30  | [11.90;17.00]        | (5.86;37.70)    | 0.05  | 0 (0%)      |
| SM (OH) C22:2 | 13.24±3.50       | 13.00  | [10.80;15.50]        | (4.61;28.40)    | 0.01  | 0 (0%)      |
| SM (OH) C24:1 | 1.22±0.34        | 1.18   | [0.98;1.43]          | (<LOD;2.56)     | 0.01  | 1 (0.1%)    |
| SM C16:0      | 122.45±27.33     | 122.00 | [104.00;138.00]      | (49.70;237.00)  | 0.04  | 0 (0%)      |
| SM C16:1      | 19.14±4.60       | 18.80  | [16.00;21.90]        | (8.08;39.50)    | 0.02  | 0 (0%)      |
| SM C18:0      | 29.34±7.58       | 28.40  | [23.90;33.90]        | (10.20;68.20)   | 0.01  | 0 (0%)      |
| SM C18:1      | 14.58±3.97       | 14.25  | [11.80;16.90]        | (5.66;36.30)    | 0.004 | 0 (0%)      |
| SM C20:2      | 0.42±0.14        | 0.40   | [0.32;0.49]          | (0.13;1.02)     | 0.01  | 0 (0%)      |
| SM C22:3      | 0.13±0.12        | 0.12   | [0.01;0.19]          | (<LOD;0.94)     | 0.004 | 339 (24.3%) |
| SM C24:0      | 21.63±5.46       | 21.15  | [17.60;24.80]        | (8.57;47.30)    | 0.07  | 0 (0%)      |
| SM C24:1      | 59.06±15.34      | 57.35  | [48.88;68.20]        | (21.60;1380.00) | 0.03  | 0 (0%)      |
| SM C26:0      | 0.09±0.04        | 0.09   | [0.07;0.12]          | (<LOD;0.30)     | 0.003 | 107 (7.7%)  |
| SM C26:1      | 0.22±0.08        | 0.21   | [0.17;0.27]          | (0.06;0.66)     | 0.01  | 0 (0%)      |

SD = standard deviation, LOD = limit of detection
